# Supplementary material for: Preconditioning of overcast-to-broken cloud transitions by riming inmarine cold air outbreaks
Source: Copernicus journal article supplement (doi:10.5194/acp-2021-82), 2021-02-08
Supplement: Supplementary file [file acp-2021-82-AC1-supplement.pdf]

### Cold Air Outbreak Evolution

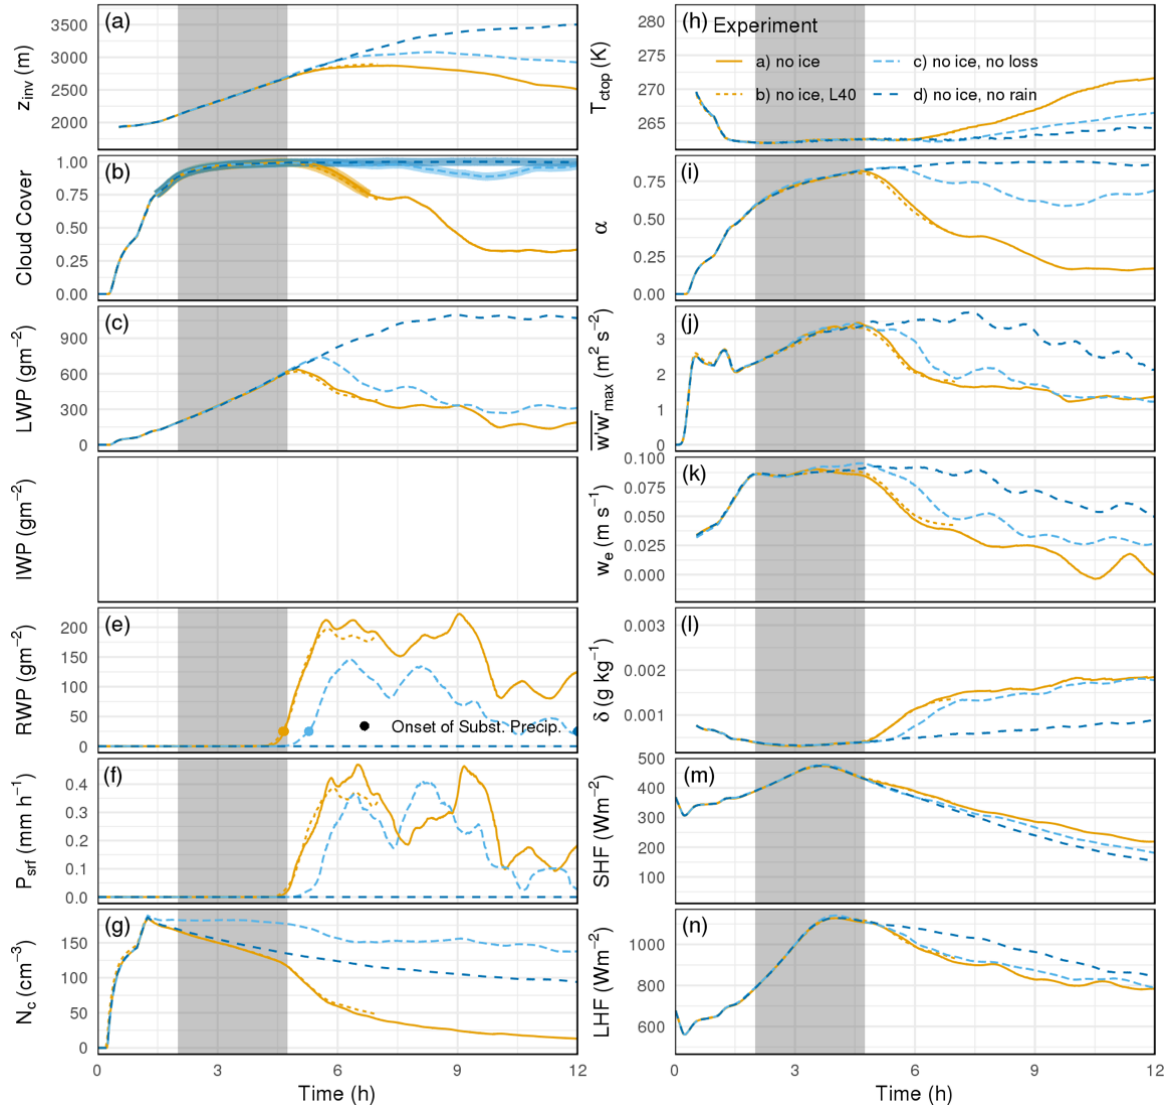

**Fig. S1:** Similar to Figure 2 in the manuscript (please see for details), we added here two ice0 simulations: “L40” refers to domain size of  $(\sim 40\text{km})^2$ , “no rain” refers to switched off autoconversion.

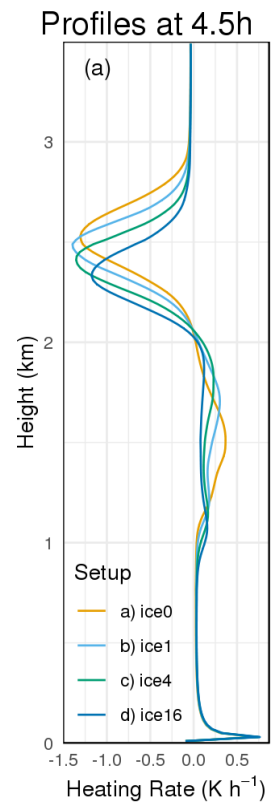

**Fig. S2:** Heating rate profiles at 4.5 h.

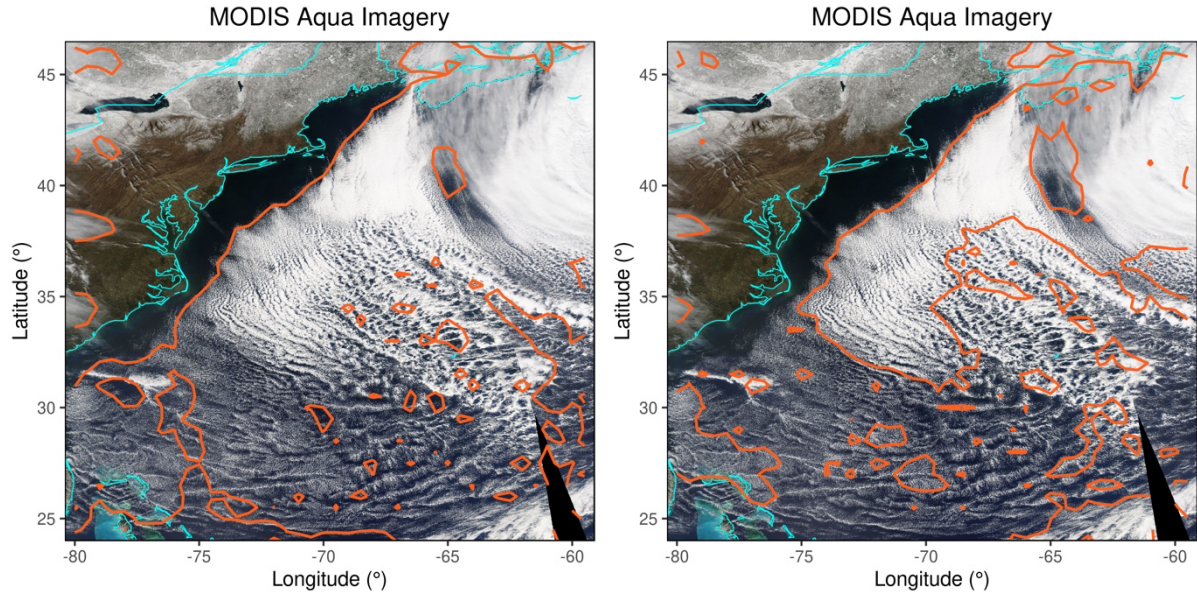

**Fig. S3:** Isolines of 50 % (left) and 75 % (right) cloud cover. From MYD06 data we determine cloud cover over regions of  $(0.5^\circ)^2$ , comparable to the extent of our large domain simulation seen in Fig. 4a. A  $(1 \text{ km})^2$  pixel is categorized as cloudy if the cloud optical depth is greater than or equal 2.5.
